# Supplementary material for: Endothelial to mesenchymal transition contributes to arsenic-trioxide-induced cardiac fibrosis
Source: PubMed Central journal article supplement (PMC5037371; doi:10.1038/srep33787), 2016-09-27

## Supplementary materials

### **Endothelial to mesenchymal transition contributes to arsenic-trioxide-induced cardiac fibrosis**

**Yong Zhang<sup>1,2\*#</sup>, Xianxian Wu<sup>1\*</sup>, Yang Li<sup>3\*</sup>, Haiying Zhang<sup>1</sup>, Zhange Li<sup>1</sup>, Ying Zhang<sup>1</sup>, Longyin Zhang<sup>1</sup>, Jiaming Ju<sup>1</sup>, Xin Liu<sup>1</sup>, Xiaohui Chen<sup>1</sup>, Peter V. Glybochko<sup>4</sup>, Vladimir Nikolenko<sup>4</sup>, Philipp Kopylov<sup>5</sup>, Chaoqian Xu<sup>1</sup>, Baofeng Yang<sup>1,6#</sup>**

<sup>1</sup>Department of Pharmacology (the State-Province Key Laboratories of Biomedicine-Pharmaceutics of China, Key Laboratory of Cardiovascular Research, Ministry of Education), College of Pharmacy, Harbin Medical University, Harbin, 150081, China

<sup>2</sup>Institute of Metabolic Disease, Heilongjiang Academy of Medical Science, Harbin, 150086, China

<sup>3</sup>Center for Endemic Disease Control, Chinese Center for Disease Control and Prevention, Key Lab of Etiology and Epidemiology, Education Bureau of Heilongjiang Province & Ministry of Health (23618504), Harbin Medical University, Harbin, 150081, China

<sup>4</sup>The Research Center, Sechenov First Moscow State Medical University, Moscow, 119991, Russia

<sup>5</sup>Department of preventive and emergency cardiology, Sechenov First Moscow State Medical University, Moscow, 119991, Russia

<sup>6</sup>Department of Pharmacology and Therapeutics, Melbourne School of Biomedical Sciences, Faculty of Medicine, Dentistry and Health Sciences, The University of Melbourne, Melbourne, 3010, Australia

\*Yong Zhang, Xianxian Wu and Yang Li contributed equally to this study.

#Corresponding author at: Department of Pharmacology, College of Pharmacy, Harbin Medical University, Harbin, 150081, China. E-mail: hmuzhangyong@hotmail.com; yangbf@ems.hrbmu.edu.cn

## Supplementary Tables

**Supplementary Table 1.** Primers used for real-time qPCR (h and r indicate human and rat species, respectively).

| Gene             | Primer Sequences (forward, reverse)                                    |
|------------------|------------------------------------------------------------------------|
| VE-cadherin (h)  | F: 5'-CAGCCCAAAGTGTGTGAGAA-3'<br>R: 5'-TGTGATGTTGGCCGTGTTAT-3'         |
| VE-cadherin (r)  | F: 5'-ACCAGTGACAGAGGCCAATACT-3'<br>R: 5'-GGCCTCCACAGTCAGGTTATAC-3'     |
| CD31(h)          | F: 5'-GAGTCCAGCCGCATATCC-3'<br>R: 5'-TGACACAATCGTATCTTCCTTC-3'         |
| CD31(r)          | F: 5'-CTCCTAAGAGCAAAGAGCAACTTC-3'<br>R: 5'-TACACTGGTATTCCATGTCTCTGG-3' |
| $\alpha$ -SMA(h) | F: 5'-TGACAATGGCTCTGGGCTCTGTAA-3'<br>R: 5'-TTCGTCACCCACGTAGCTGTCTTT-3' |
| $\alpha$ -SMA(r) | F: 5'-CTGTGCTATGTCGCTCTGGA-3'<br>R: 5'-CTGTGCTATGTCGCTCTGGA-3'         |
| FSP1(h)          | F: 5'-GTCCACCTTCCACAAGTAC-3'<br>R: 5'-TGTCCAAGTTGCTCATCAG-3'           |
| FSP1(r)          | F: 5'-AGGACAGACGAAGCTGCATT-3'<br>R: 5'-CTCACAGCCAACATGGAAGA-3'         |
| Snail(h)         | F: 5'-GCCTTCAACTGCAAATACTGC-3'<br>R: 5'-CTTCTTGACATCTGAGTGGGTC-3'      |
| Col1a(h)         | F: 5'-CTTGCTTGAAGACCCATGCG-3'<br>R: 5'-TTGGCAGTCTGAGAACCCCA-3'         |
| Col1a(r)         | F: 5'-GGTCAGACCTGTGTGTTCCC-3'<br>R: 5'-GGTCCATGTAGGCTACGCTG-3'         |
| Col3a(h)         | F: 5'-AACACGCAAGGCTGTGAGACT-3'<br>R: 5'-TTTTGTCGGTCACTTGCACTG-3'       |
| Col3a(r)         | F: 5'-CAATGTAAAGAAGTCTCTGAAG-3'<br>R: 5'-CAAACAGGGCCAATGTCCAC-3'       |
| Mmp2(h)          | F: 5'-CCGTCGCCCATCATCAA-3'<br>R: 5'-AGATATTGCACTGCCAACTCT-3'           |
| Mmp2(r)          | F: 5'-TCCCGAGATCTGCAAGCAAG-3'<br>R: 5'-AGAATGTGGCCACCAGCAAG-3'         |
| Mmp9(h)          | F: 5'-GTGCTGGGCTGCTGCTTTGCTG-3'<br>R: 5'-GTCGCCCTCAAAGGTTTGAAT-3'      |
| Mmp9(r)          | F: 5'-TGGAACACACAACGTCTTTCA-3'<br>R: 5'-TCACCCGGTTGTGGAAACTC-3'        |
| Fibronectin(h)   | F: 5'-GATAAATCAACAGTGGGAGC-3'<br>R: 5'-CCCAGATCATGGAGTCTTTA-3'         |
| Fibronectin(r)   | F: 5'-TCAGCTGTACCATTGCAAATC-3'<br>R: 5'-TGGTGTCCCTGATCATTGCAT-3'       |
| Vimentin(h)      | F: 5'-GAGAAGTTTGCCGTTGAAGC-3'                                          |

|             |                                                                  |
|-------------|------------------------------------------------------------------|
|             | R: 5'-TCCAGCAGCTTCCTGTAGGT-3'                                    |
| Vimentin(r) | F: 5'-TCCCTGAACCTGAGAGAAAC-3'<br>R: 5'-ATCGTGGTGCTGAGAAGTC-3'    |
| GAPDH(h, r) | F: 5'-AAGGTCGGAGTCAACGGATTT-3'<br>R: 5'-AGATGATGACCCTTTTGGCTC-3' |

**Supplementary Table 2.** The parameters of echocardiography of rats after exposure to As<sub>2</sub>O<sub>3</sub>.

|             | Control       | As <sub>2</sub> O <sub>3</sub><br>(0.4 mg/kg) | As <sub>2</sub> O <sub>3</sub><br>(0.8 mg/kg) | As <sub>2</sub> O <sub>3</sub><br>(1.6 mg/kg) |
|-------------|---------------|-----------------------------------------------|-----------------------------------------------|-----------------------------------------------|
| IVS;d(mm)   | 1.84 ± 0.10   | 1.89 ± 0.05                                   | 1.99 ± 0.04                                   | 2.23 ± 0.14*                                  |
| IVS;s(mm)   | 2.72 ± 0.09   | 2.90 ± 0.09                                   | 3.16 ± 0.10                                   | 3.21 ± 0.28                                   |
| LVID;d(mm)  | 5.07 ± 0.09   | 6.72 ± 0.18**                                 | 6.74 ± 0.38**                                 | 6.88 ± 0.31**                                 |
| LVID;s(mm)  | 2.69 ± 0.09   | 3.84 ± 0.14*                                  | 3.90 ± 0.44*                                  | 4.46 ± 0.25**                                 |
| LVPW;d(mm)  | 1.79 ± 0.06   | 2.03 ± 0.06                                   | 2.17 ± 0.10*                                  | 2.39 ± 0.11**                                 |
| LVPW;s(mm)  | 2.80 ± 0.03   | 2.93 ± 0.08                                   | 3.00 ± 0.09                                   | 3.18 ± 0.07**                                 |
| LV mass(mg) | 666.5 ± 43.40 | 932.6 ± 31.77                                 | 975.1 ± 60.64*                                | 1039.0 ± 120.70*                              |
| LVEDV(μL)   | 145.5 ± 8.53  | 238.1 ± 10.26                                 | 238.2 ± 32.13*                                | 244.0 ± 27.15*                                |
| LVESV(μL)   | 35.17 ± 11.66 | 77.20 ± 4.05                                  | 83.43 ± 14.34*                                | 100.50 ± 13.21**                              |

Results represent mean ± S.E.M. n = 4–5 rats in each group. IVS, interventricular septum; LVID, left ventricular internal dimension; LVPW, left ventricular posterior wall; LV mass, left ventricular mass; d, diastole; s, systole; LVEDV, left ventricular end-diastolic volume; LVESV, Left ventricular end-systolic volume.

## Supplementary Figures

**Supplementary Figure 1.** Collagen production in the control group and As<sub>2</sub>O<sub>3</sub>-treated groups by transmission electron microscopy. Collagens are indicated by yellow stars. Scale bar=2 μm. \*p < 0.05 vs Control. n=3.

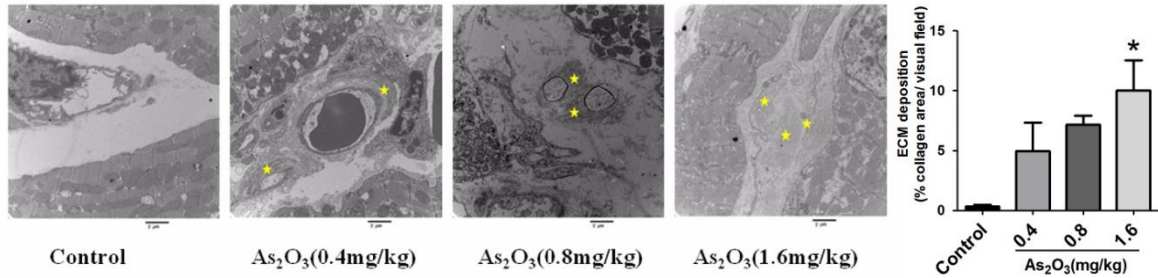

**Supplementary Figure 2.** Relative mRNA expression of EndMT marker genes SNAIL, TWIST and SLUG in heart tissue. \*p<0.05, \*\*p<0.01, \*\*\*p<0.001 vs Control. n=3.

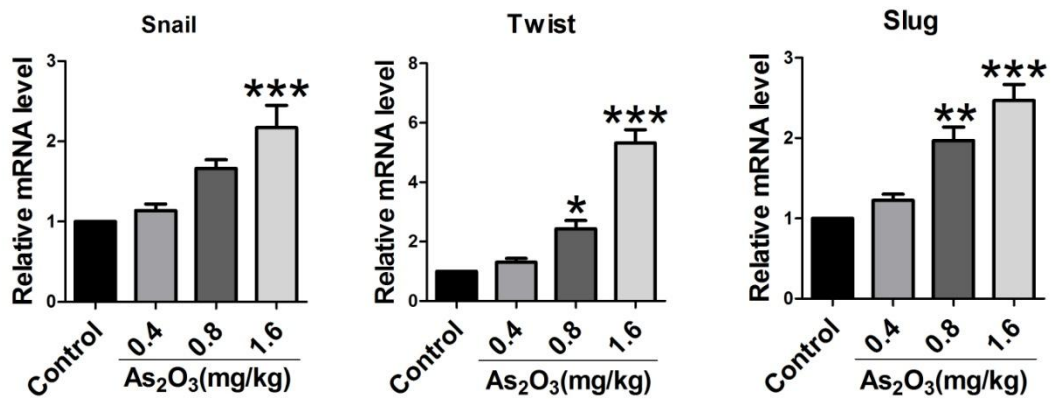

**Supplementary Figure 3. Effects of As<sub>2</sub>O<sub>3</sub> on the AKT/GSK-3β/Snail signaling pathway in vivo.** (a) The protein levels of p-AKT, AKT, p-GSK-3β, GSK-3β and Snail were detected by western blotting in heart tissues after exposure to As<sub>2</sub>O<sub>3</sub>. n=3. (b) Co-immunostaining of CD31 and p-AKT in cardiac sections of rats treated with or without As<sub>2</sub>O<sub>3</sub>, nuclei are stained with DAPI (blue). Scale bar=30 μm. (c) Co-immunostaining of CD31 and p-GSK-3β in cardiac sections of rats treated with or without As<sub>2</sub>O<sub>3</sub>, nuclei are stained with DAPI (blue). Scale bar=30 μm. (d) Co-immunostaining of CD31 and snail in cardiac sections of rats treated with or without As<sub>2</sub>O<sub>3</sub>, nuclei are stained with DAPI (blue). Scale bar=30 μm.

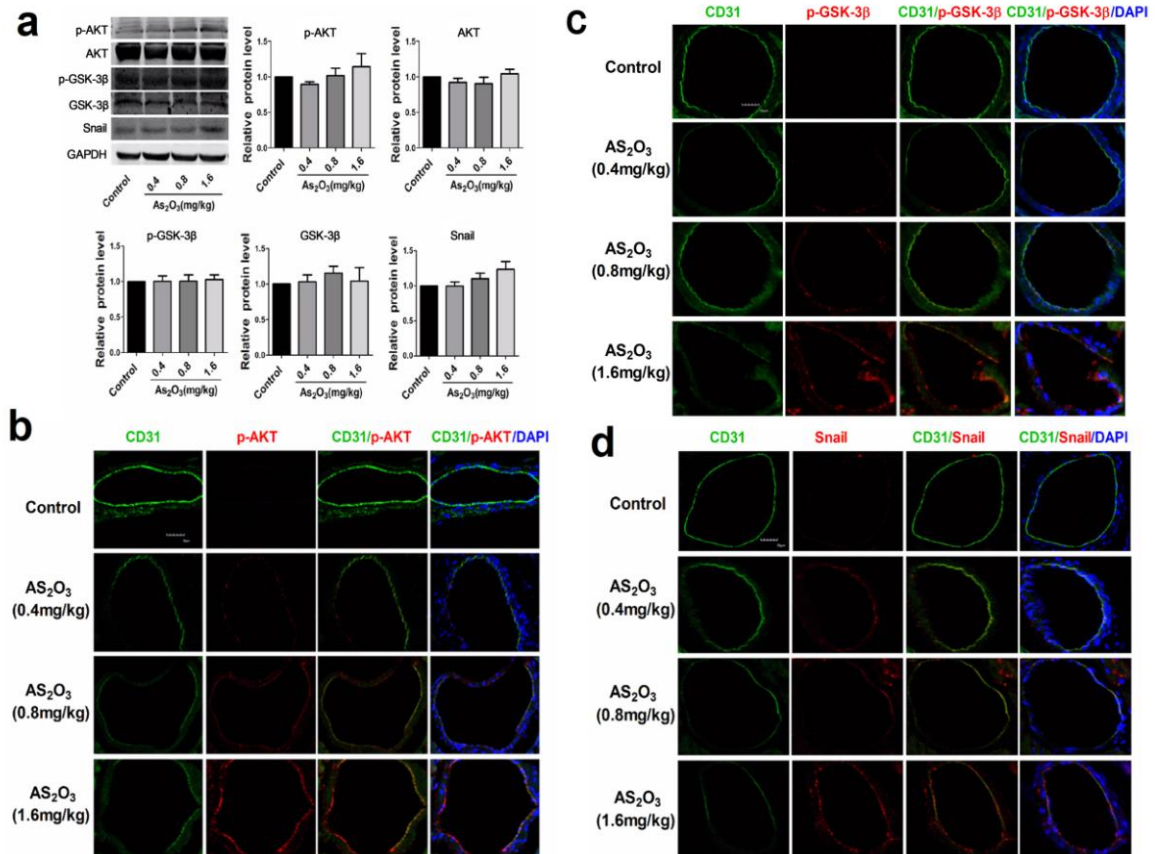

**Supplementary Figure 4.** Inhibitory effect of NAC on intracellular ROS accumulation and on the activation of AKT/GSK-3 $\beta$ /Snail pathway when exposed to As<sub>2</sub>O<sub>3</sub>. (a) Confocal images of 2',7'-dichlorofluorescein (DCF) staining showed ROS level in control endothelial cells, cells incubated with As<sub>2</sub>O<sub>3</sub> and cells in the presence of As<sub>2</sub>O<sub>3</sub> (8  $\mu$ M) and NAC (5 mM). (b) Representative western blotting bands and analyzed data for the expression of p-AKT, AKT, p-GSK-3 $\beta$ , GSK-3 $\beta$  and snail in endothelial cells in different groups. \*p<0.05, \*\*p<0.01, \*\*\*p<0.001 vs Control, #p<0.05, ##p<0.01, ###p<0.001 vs As<sub>2</sub>O<sub>3</sub>. n=3.

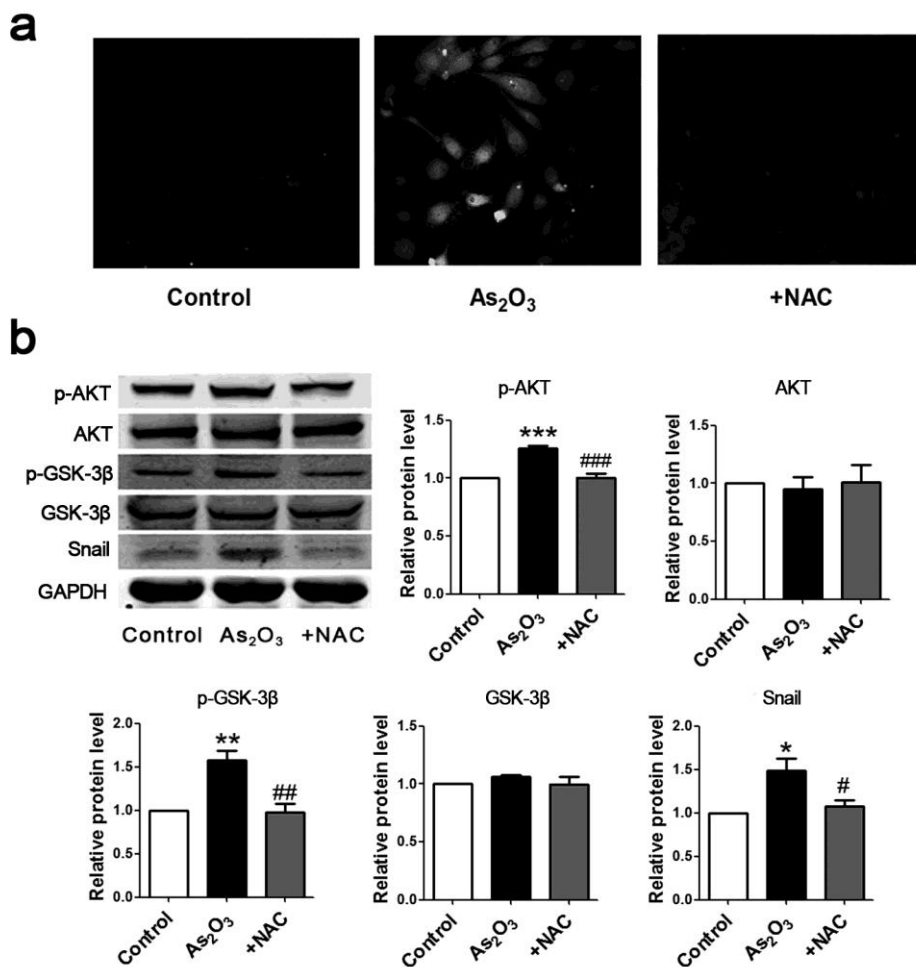

Supplement: srep33787-s1.pdf [file srep33787-s1.pdf]
